# Supplementary material for: Cancer-associated fibroblast-induced lncRNA UPK1A-AS1 confers platinum resistance in pancreatic cancer via efficient double-strand break repair
Source: PubMed Central journal article supplement (PMC9010302; doi:10.1038/s41388-022-02253-6), 2022-03-09
Supplement: 41388_2022_2253_MOESM1_ESM.pdf [file 41388_2022_2253_MOESM1_ESM.pdf]

## Supplementary Material

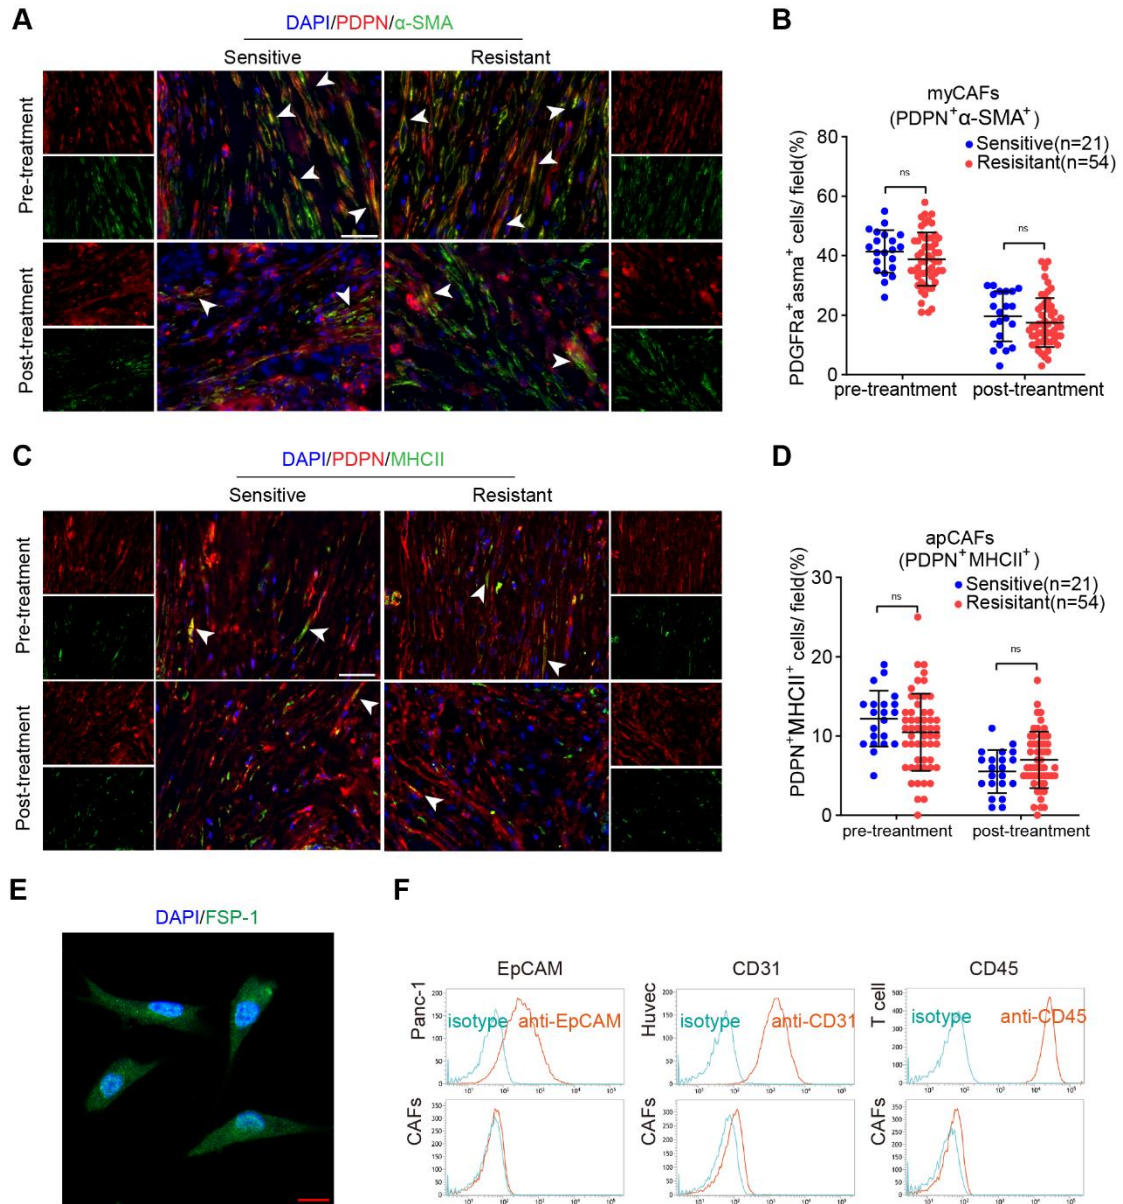

Figure S1. CAF subpopulation in tumors and identification of primary human CAFs.

(A, C) Representative immunofluorescence images of advanced pancreatic cancer biopsies before and after chemotherapy. Arrows indicate myCAFs: PDPN<sup>+</sup> $\alpha$ SMA<sup>+</sup> (A) and apCAFs: PDPN<sup>+</sup>MHCII<sup>+</sup> (C), Scale bar= 50  $\mu$ m. Quantification of the presence of myCAFs (B) and apCAFs (D). (E) Immunofluorescence of FSP-1 in primary CAFs isolated from pancreatic cancer tissue. Scale bar=20  $\mu$ m. (F) CAFs isolated from pancreatic cancer tissue were negative for EpCAM (epithelial marker), CD31 (endothelial marker) and CD45 (leukocyte marker), as determined by flow

cytometry. Panc-1 cells, human umbilical vein endothelial cells (HUVECs) and human T lymphocytes were used as positive controls. Images of a representative sample are shown. The results are presented as the mean  $\pm$  SD. ns no significance.

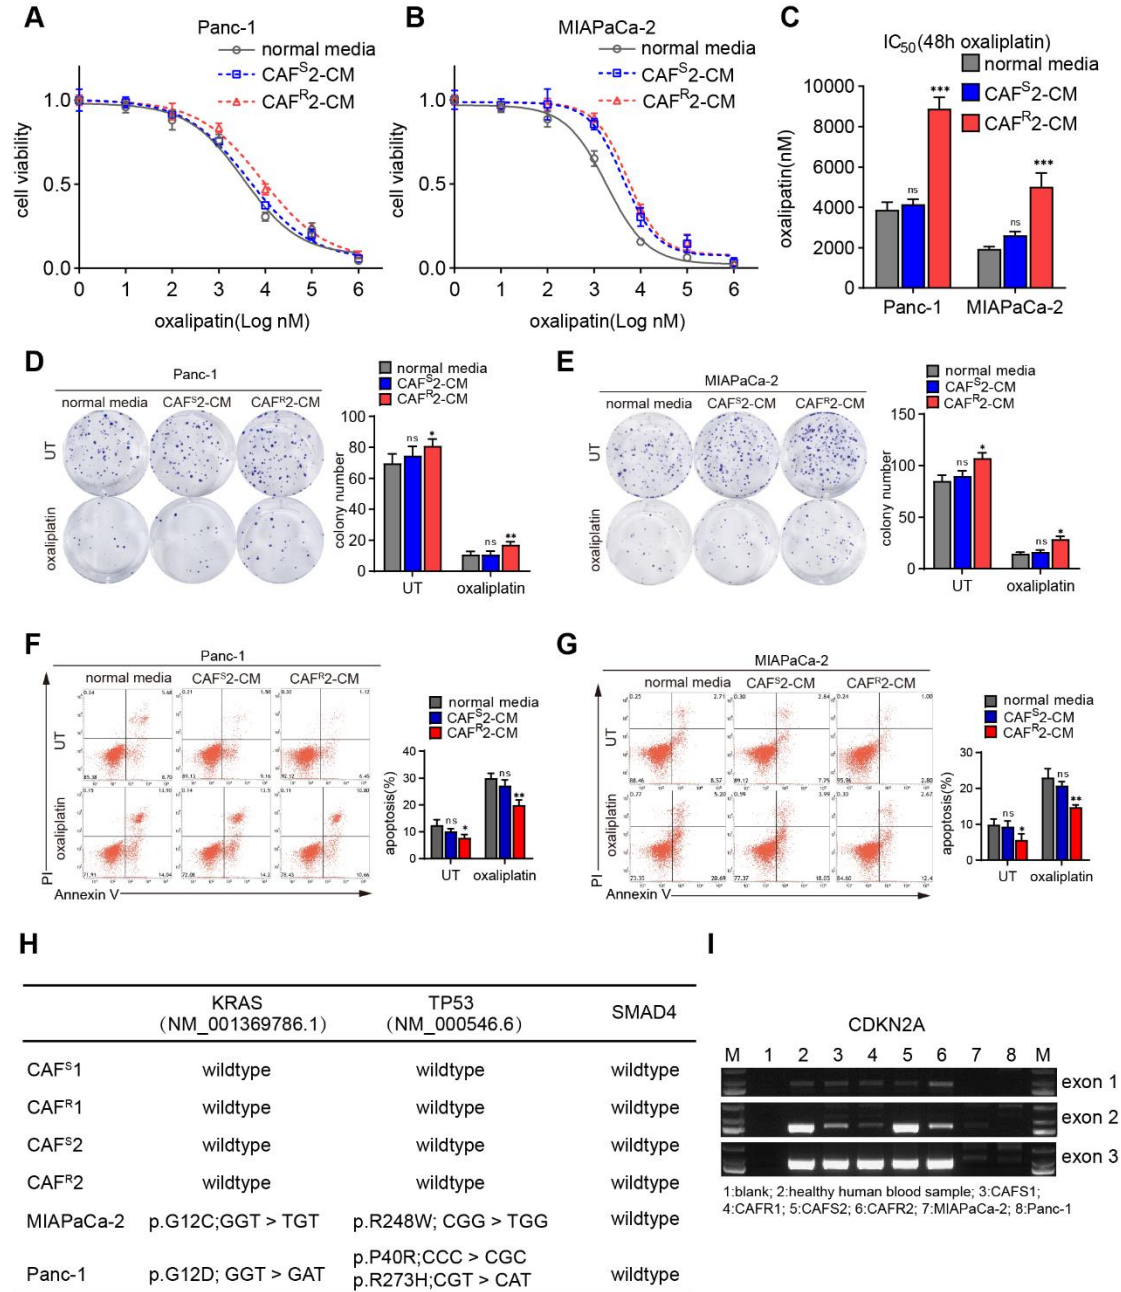

Figure S2. The in vitro function of CAF<sup>R</sup>2-CM and validation of mutations in CAF cell lines.

Panc-1 and MIAPaCa-2 cells were cultured with CAF<sup>S</sup>2-CM or CAF<sup>R</sup>2-CM for 3 days and then subjected to the indicated experiments. (A-C) Cells were treated with

oxaliplatin for 48h. Cell viability was measured by CCK-8 and the IC50 value was calculated. **(D-E)** Colony formation and **(F-G)** flow cytometry apoptosis analyses were performed to evaluate the chemoresistance of pancreatic cancer cells in each group. **(H)** Mutation in CAF cell lines from Sanger sequencing data. Panc-1 and MIAPaCa-2 cells were used as positive control. **(I)** Electrophoresis results of the PCR products of exons 1, 2 and 3 of CDKN2A. Panc-1 and MIAPaCa-2 cells were used as negative controls. The results are presented as the mean  $\pm$  SD of 3 technical replicates. \*,  $P < 0.05$ ; \*\*,  $P < 0.01$ ; \*\*\*,  $P < 0.001$ ; ns no significance.

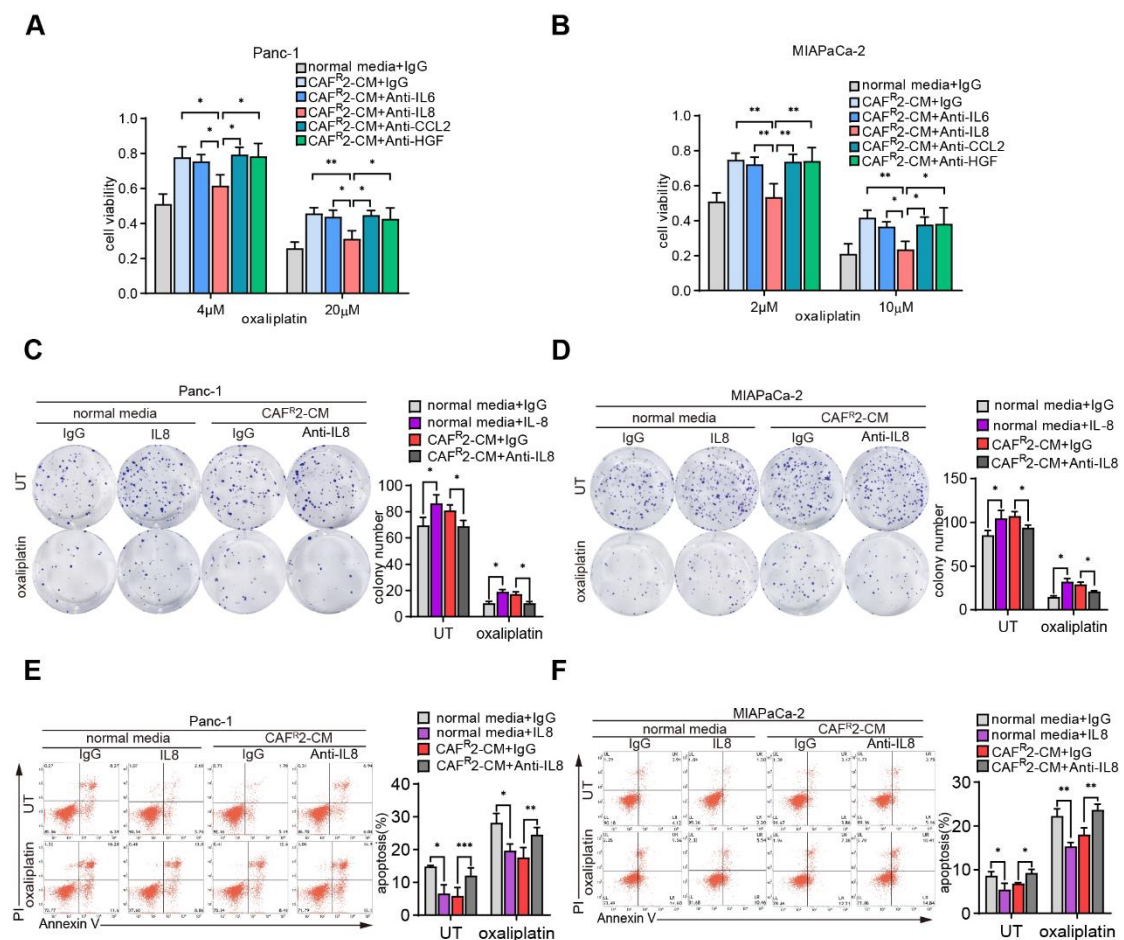

Figure S3. Paracrine IL8 was essential for CAF<sup>R</sup>-induced oxaliplatin resistance in tumor cells.

CAF<sup>R2</sup>-CM with different neutralizing antibodies was used to culture Panc-1 **(A)** and MIAPaCa-2 **(B)** cells for 3 days. After 48 h of oxaliplatin exposure, cell viability was measured by CCK8. Panc-1 and MIAPaCa-2 was cultured under IL8 (100 ng/ml) or

CAF<sup>R2</sup>-CM with an anti-IL8 neutralizing antibody (250 ng/ml) for 3 days. Colony formation assay (**C-D**) and flow cytometry apoptosis analysis (**E-F**) were performed to evaluate the chemoresistance of pancreatic cancer cells in each group. The results are presented as the mean  $\pm$  SD of 3 technical replicates. \*, P < 0.05; \*\*, P < 0.01; \*\*\*, P < 0.001; ns no significance.

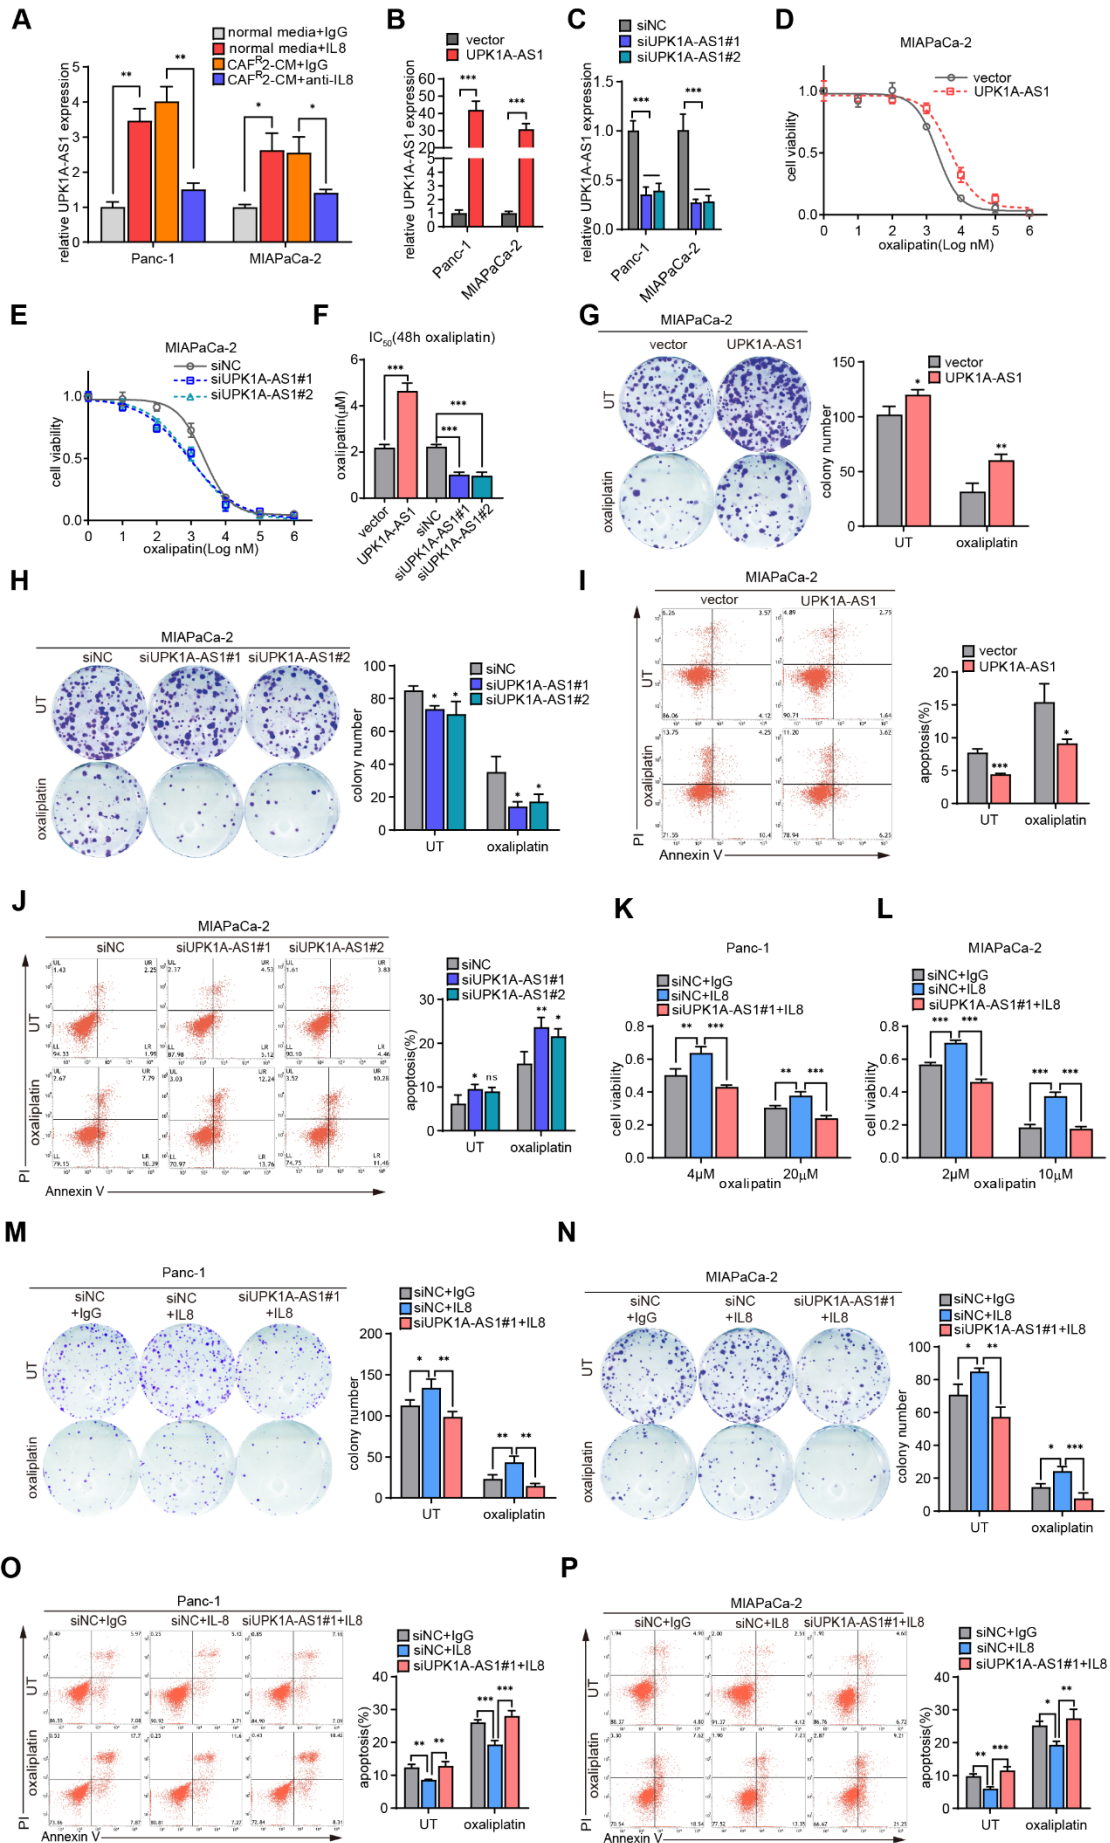

Figure S4. UPK1A-AS1 regulated oxaliplatin chemoresistance in pancreatic cancer cells.

(A) UPK1A-AS1 expression levels in Panc-1 and MIAPaCa-2 cells cultured with IL8 (100 ng/ml) or CAF<sup>R</sup>2-CM with an anti-IL8 neutralizing antibody (250 ng/ml) for 3 days. (B-C) qRT-qPCR analysis verified the overexpression and knockdown efficiency in the Panc-1 and MIAPaCa-2. UPK1A-AS1 was overexpressed or knocked down in MIAPaCa-2 cells and oxaliplatin was given. CCK-8 assay (D-F), colony formation assay (G-H) and flow cytometry apoptosis analyses (I-J) were performed to evaluate chemoresistance in each group. UPK1A-AS1 knockdown was performed in Panc-1 and MIAPaCa-2 cells. CCK-8 assay (K-L), colony formation assay (M-N) and flow cytometry apoptosis analyses (O-P) revealed that the IL8 treatment (100 ng/ml for 3 days) failed to induce chemoresistance in the si-UPK1A-AS1 cells. The results are presented as the mean  $\pm$  SD of 3 technical replicates. \*, P < 0.05; \*\*, P < 0.01; \*\*\*, P < 0.001; ns no significance.

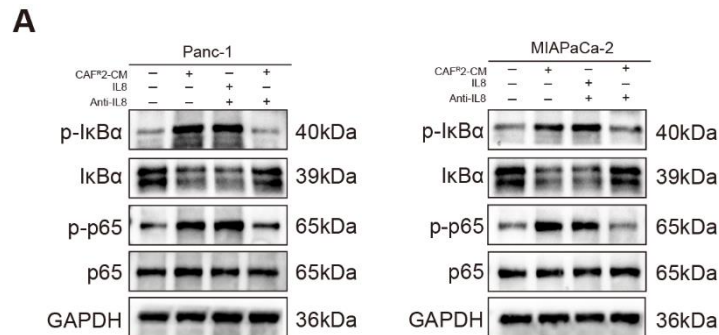

Figure S5. CAF<sup>R</sup>-derived IL8 activated the NF- $\kappa$ B signaling pathway in Panc-1 and MIAPaCa-2 cells.

(A) Western blot analysis of I $\kappa$ B $\alpha$ , p-I $\kappa$ B $\alpha$ , p65, and p-p65 protein expression in Panc-1 and MiaPaCa-2 cells treated with CAF<sup>R</sup>2-CM or IL8. A neutralizing antibody against IL8 was used to deplete IL8 in CAF<sup>R</sup>2-CM.

**A**

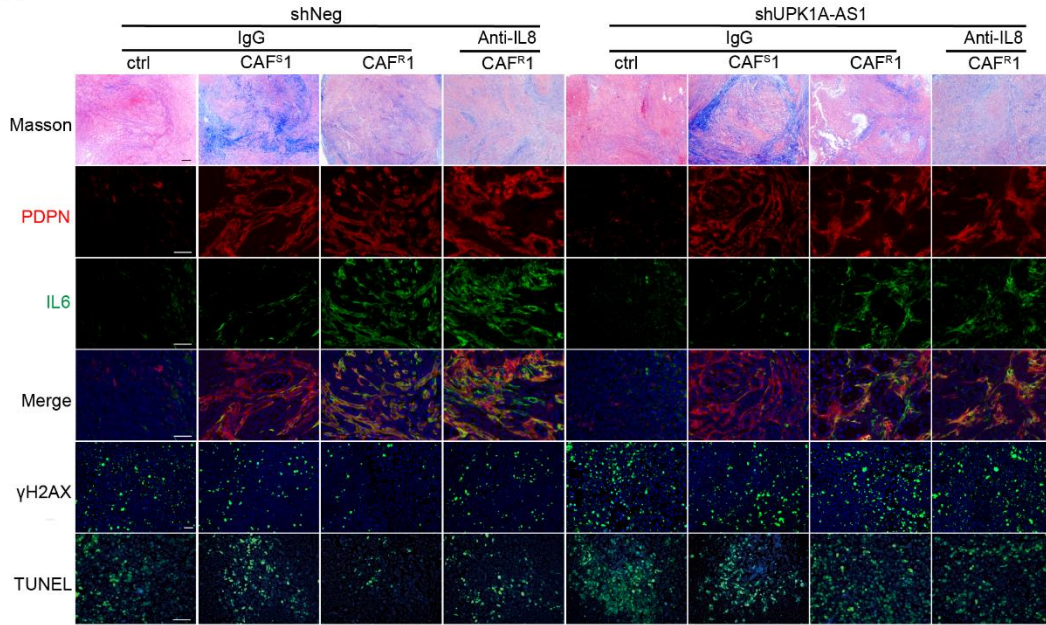

**B**

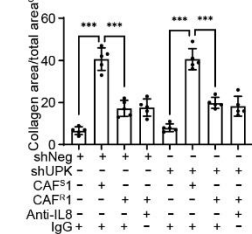

**C**

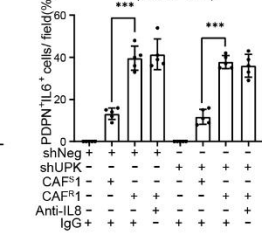

**D**

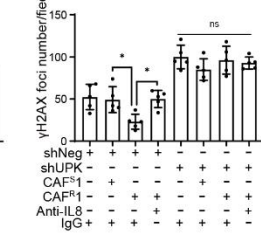

**E**

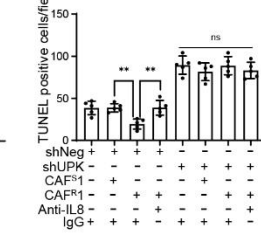

**F**

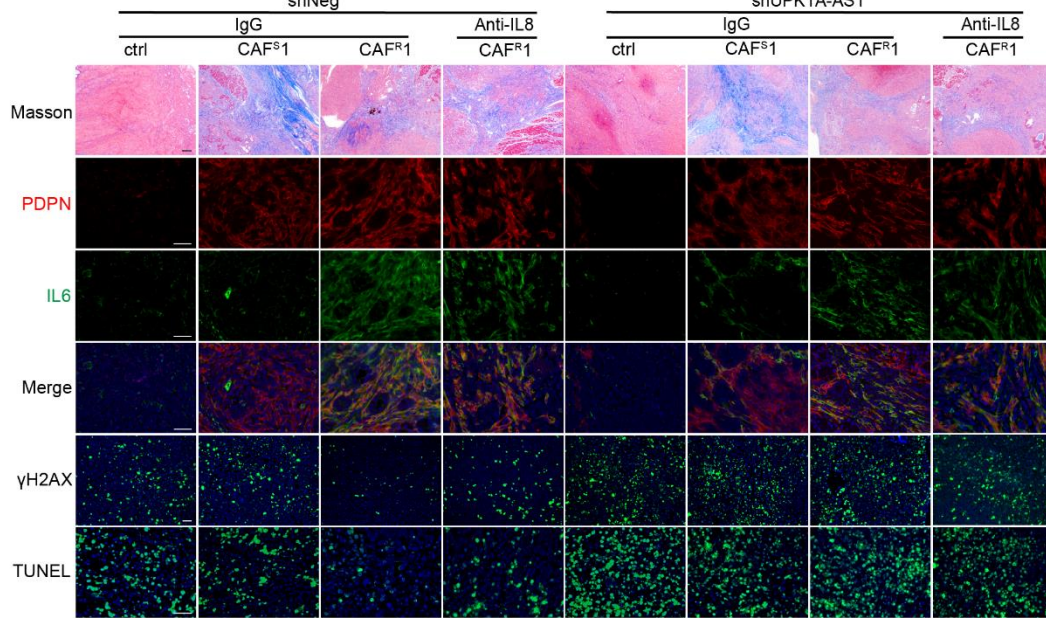

**G**

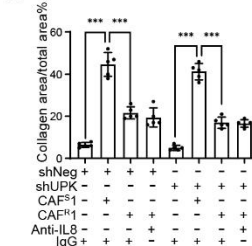

**H**

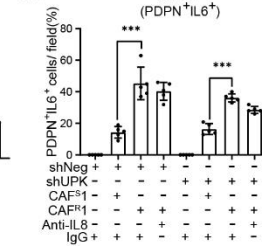

**I**

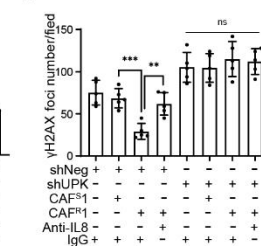

**J**

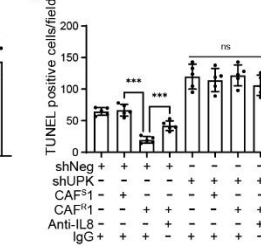

Figure S6. Characterization of tumors tissues of animal models.

Representative images of Masson trichrome, immunofluorescence analysis of iCAFs populations and  $\gamma$ H2AX and TUNEL assays of subcutaneous (**A**) and orthotopic model (**F**). Black bar=200  $\mu$ m, white bar=50  $\mu$ m. Quantification of collagen depositions (**B, G**), the presence of iCAFs (**C, H**), the number of  $\gamma$ h2ax-positive foci (**D, I**) and TUNEL-positive cells (**E, J**) in each group. The results are presented as the mean  $\pm$  SD. N=5/per group. \*, P < 0.05; \*\*, P < 0.01; \*\*\*, P < 0.001; ns no significance.



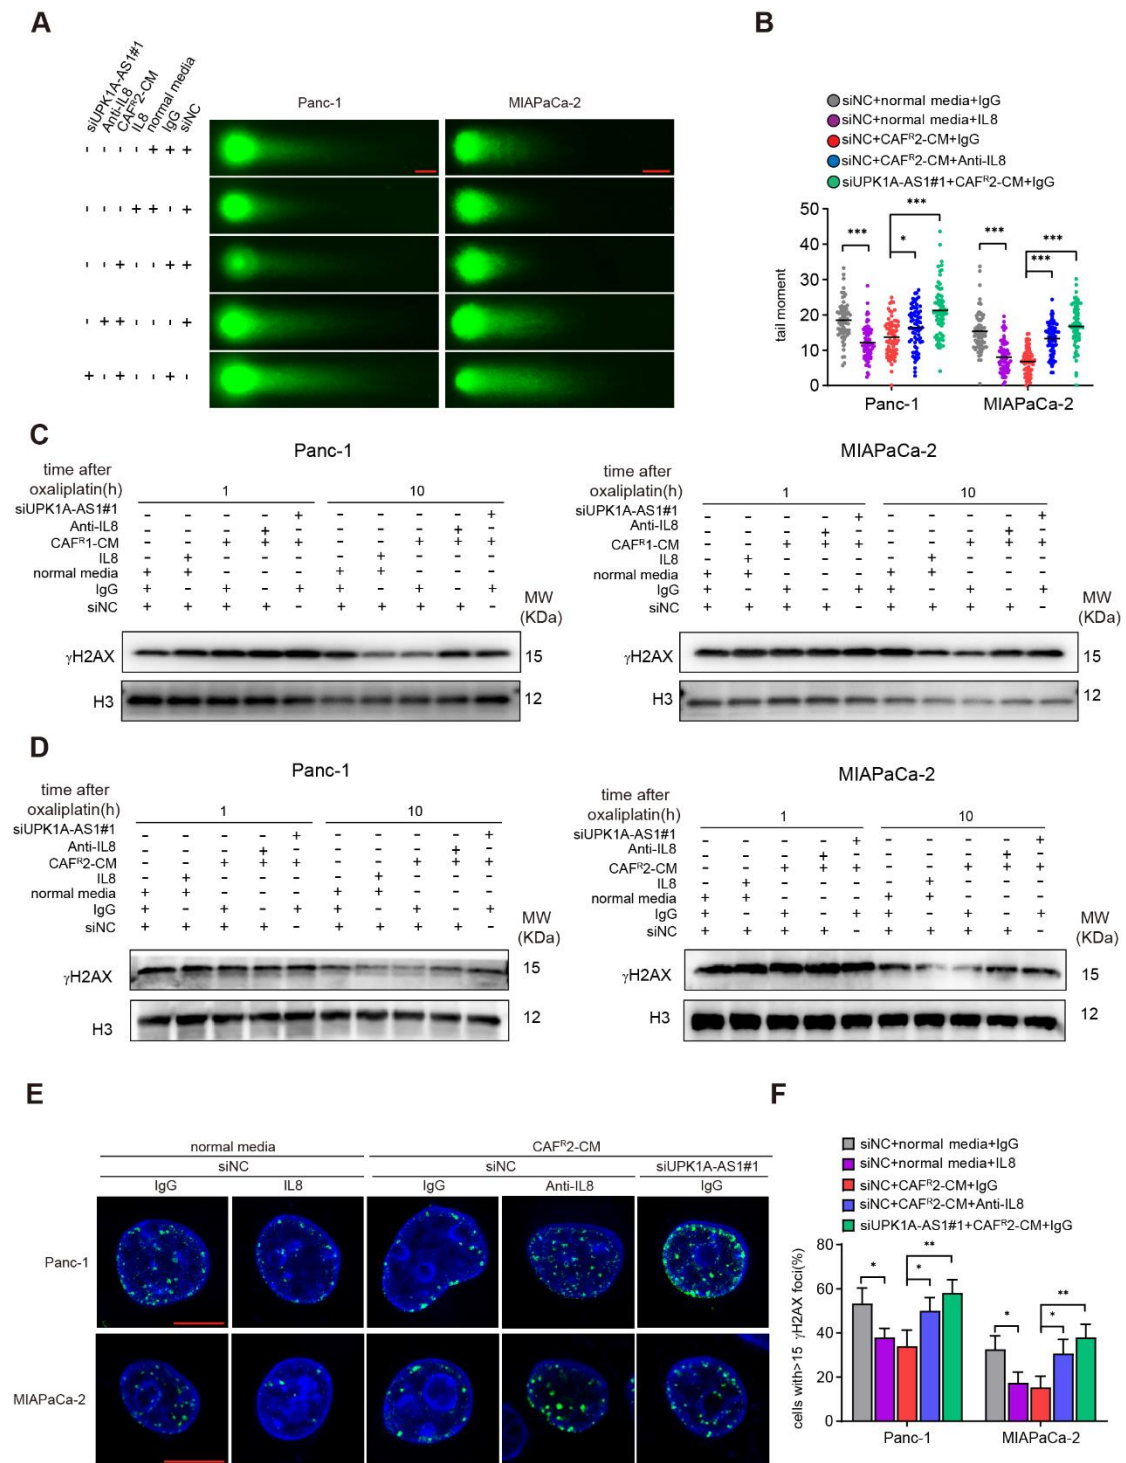

Figure S7. The CAF<sup>R</sup>/IL8/UPK1A-AS1 axis attenuated the DSB induced by oxaliplatin.

IL-8 (100 ng/ml), an anti-IL8 neutralizing antibody (250 ng/ml), and CAF<sup>R</sup>-CM were given to each group as indicated for 3 days. Panc-1 and MIAPaCa-2 cells were treated with 50  $\mu$ M oxaliplatin and 30  $\mu$ M oxaliplatin, respectively, in all experiments. (A)

Oxaliplatin-induced DNA damage in control and UPK1A-AS1 knockdown Panc-1 and MIAPaCa-2 cells was measured by neutral comet assay. Scale bar=10 $\mu$ m. **(B)** Levels of oxaliplatin-induced DNA damage, quantified by the tail moment in the neutral comet assay. In total, 70 cells per group are counted. Western blot analysis of  $\gamma$ H2AX in Panc-1 cells and MIAPaCa-2 cells treated with CAF<sup>R</sup>1-CM **(C)** and CAF<sup>R</sup>2-CM **(D)**. **(E)** Representative pictures of  $\gamma$ H2AX-positive foci in each group. Scale bar=10 $\mu$ m. **(F)** Quantification of the number of  $\gamma$ h2ax positive foci in each group. At least 40 cells per group are counted.

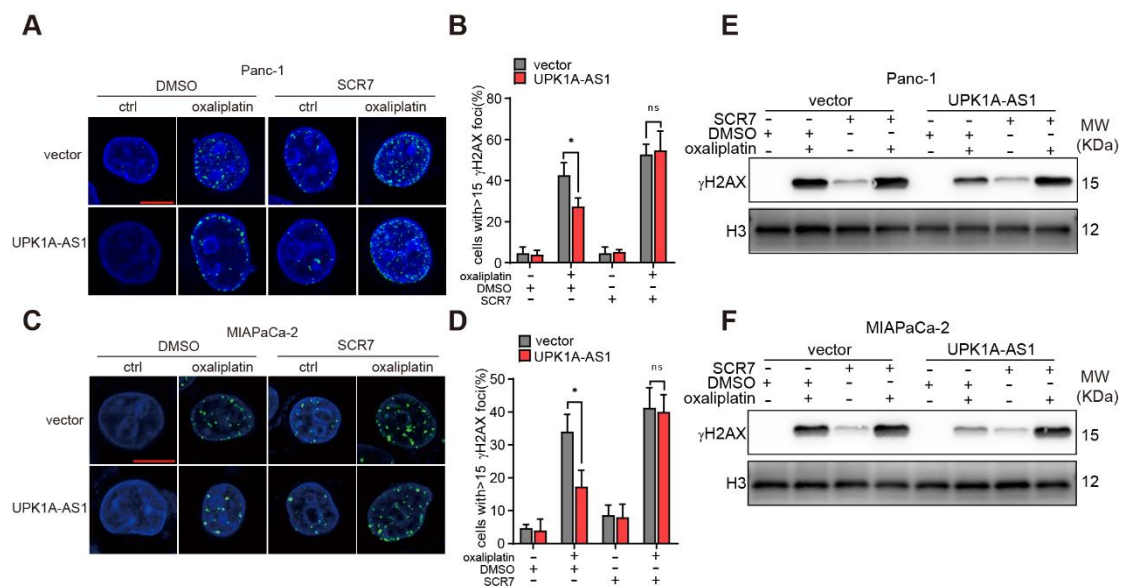

Figure S8 Inhibition of the NHEJ pathway overcame UPK1A-AS1-induced resistance to oxaliplatin

**(A, C)** Panc-1 and MIAPaCa-2 cells transfected with control vector or UPK1A-AS1 were exposed to oxaliplatin (50  $\mu$ M and 30  $\mu$ M respectively) for 1 h. Then, the cells were allowed to recover for 5 h under 10  $\mu$ M SCR7 or vehicle control (DMSO). Representative images of immunofluorescence of  $\gamma$ H2AX are shown. Scale bar=10  $\mu$ m. **(B, D)** Quantification of the number of  $\gamma$ h2ax-positive foci in each group. At least 40 cells per group are counted. **(E-F)** Representative images of western blot analysis of  $\gamma$ H2AX in each group. The results are presented as the mean  $\pm$  SD. \*,  $P < 0.05$ ; ns no significance.

**Table S1. Primer, probes and oligonucleotides used in the experiments.**

| Gene                    | Sequence (5'-3')         | Application           |               |
|-------------------------|--------------------------|-----------------------|---------------|
| UPK1A-AS1-F             | AAGACCTCGCCTTCCATGAG     | qRT-PCR               |               |
| UPK1A-AS1-R             | GCATCCCCTTTTATCCCCGA     |                       |               |
| GAPDH-F                 | CCTTCCGTGTCCCCACT        | qRT-PCR               |               |
| GAPDH-R                 | GCCTGCTTCACCACCTTC       |                       |               |
| U6-F                    | CTCGCTTCGGCAGCACA        | qRT-PCR               |               |
| U6-R                    | AACGCTTCACGAATTTGCGT     |                       |               |
| IL1B-F                  | GGGCCTCAAGGAAAAGAATC     | qRT-PCR               |               |
| IL1B-R                  | TTCTGCTTGAGAGGTGCTGA     |                       |               |
| IL6-F                   | ACTCACCTCTTCAGAACGAATTG  | qRT-PCR               |               |
| IL6-R                   | CCATCTTTGGAAGGTTTCAGGTTG |                       |               |
| IL8-F                   | TAGCAAATTTGAGGCCAAGG     | qRT-PCR               |               |
| IL8-R                   | GGACTTGTGGATCCTGGCTA     |                       |               |
| LIF-F                   | CCCTGGTCCCTACTCAACAA     | qRT-PCR               |               |
| LIF-R                   | CTGGACCCTGACACCCTAAA     |                       |               |
| CSF3-F                  | ACGAGGGTCAGGACTGTGAC     | qRT-PCR               |               |
| CSF3-R                  | GTGACAGTGGAGGGGACACT     |                       |               |
| COL1A1-F                | GAGGGCCAAGACGAAGACATC    | qRT-PCR               |               |
| COL1A1-R                | CAGATCACGTCATCGCACAAC    |                       |               |
| COL1A1-F                | TGGACGATCAGGCGAAACC      | qRT-PCR               |               |
| COL2A1-R                | GCTGCGGATGCTCTCAATCT     |                       |               |
| COL3A1-F                | GCCAAATATGTGTCTGTGACTCA  | qRT-PCR               |               |
| COL3A1-R                | GGGCGAGTAGGAGCAGTTG      |                       |               |
| ACTG2-F                 | GCGTGTAGCACCTGAAGAG      | qRT-PCR               |               |
| ACTG2-R                 | GAATGGCGACGTACATGGCA     |                       |               |
| CDH18-F                 | CAAAAGGGGATGGGTATGGAATC  | qRT-PCR               |               |
| CDH18-R                 | CCCGTGGTATCGTCAATGATAAA  |                       |               |
| siUPK1A-AS1#1-sense     | GCAUCUCCACGAGCAAGUUTT    | siRNA                 |               |
| siUPK1A-AS1#1-antisense | AACUUGCUCGUGGAGAUGCTT    |                       |               |
| siUPK1A-AS1#2-sense     | GCAAAGACCUCGCCUUCATT     | siRNA                 |               |
| siUPK1A-AS1#2-antisense | UGGAAGGCGAGGUCUUUGCTT    |                       |               |
| si p65#1-sense          | GCACCAUCAACUAUGAUGATT    | siRNA                 |               |
| si p65#1-antisense      | UCAUCAUAGUUGAUGGUGCTT    |                       |               |
| si p65#2-sense          | GGAGUACCCUGAGGCUAUATT    | siRNA                 |               |
| si p65#2-antisense      | UAUAGCCUCAGGGUACUCCTT    |                       |               |
| Cy3-UPK1A-AS1           | CAAATGGGGAGGGAACTTGCTC   | FISH                  |               |
| double-DIG-UPK1A-AS1    | AGACCTTCCTAACCACCGCT     | ISH                   |               |
| KRAS                    | Condon 12 and 13-F       | ACATGTTCTAATATAGTCAC  | amplification |
|                         | Condon 12 and 13-R       | CTATTGTTGGATCATATTCG  |               |
|                         | Condon 61-F              | TTCCTACAGGAAGCAAGTAGT | amplification |
|                         | Condon 61-R              | CATGGCATTAGCAAAGACTC  |               |

|         |                       |                                |               |
|---------|-----------------------|--------------------------------|---------------|
| TP53    | Exon3-F               | TGA CTG CTC TTT TCA CCC A T    | amplification |
|         | Exon3-R               | AAC TCT GTC TCC TTC CTC TT     |               |
|         | Exon4-F               | AAC TCT GTC TCC TTC CTC TT     | amplification |
|         | Exon4-R               | GCC CCA GCT GCT CAC CAT CGC TA |               |
|         | Exon5-F               | TCT GAT TCC TCA CTG ATT GC     | amplification |
|         | Exon5-R               | CCA GAG ACC CCA GTT GCA AA     |               |
|         | Exon6-F               | CCTCATCTTGGGCCTGTGTT           | amplification |
|         | Exon6-R               | GCAGTAAGGAGATTCCCCGC           |               |
| SMAD4   | Exon7-F               | CCT CTT AAC CTG TGG CTT CTC    | amplification |
|         | Exon7-R               | TAA CTG CAC CCT TGG TCT CCT    |               |
|         | Exon1-F               | CGTTAGCTGTTGTTTTCACTG          | amplification |
|         | Exon1-R               | ACAGTATCTGAAGAGATGGAG          |               |
|         | Exon2-F               | TGTATGACATGGCCAAGTTAG          | amplification |
|         | Exon2-R               | CAATACTCGGTTTTAGCAGTC          |               |
|         | Exon3-F               | CTGAATTGAAATGGTTCATGAAC        | amplification |
|         | Exon3-R               | GCCCCTAACCTCAAATCTAC           |               |
|         | Exon4-F               | TTTTGCTGGTAAAGTAGTAGC          | amplification |
|         | Exon4-R               | CTATGAAAGATAGTACAGTTAC         |               |
|         | Exon5 and 6-F         | CATCTTTATAGTTGTGCATTATC        | amplification |
|         | Exon5 and 6-R         | TAATGAAACAAAATCACAGGATG        |               |
|         | Exon7-F               | TGAAAGTTTTAGCATTAGACAAC        | amplification |
|         | Exon7-R               | TGTACTCATCTGAGAAGTGAC          |               |
|         | Exon8-F               | TGTTTTGGGTGCATTACATTC          | amplification |
|         | Exon8-R               | CAATTTTTTAAAGTAACTATCTGA       |               |
|         | Exon9-F               | TATTAAGCATGCTATACAATCTG        | amplification |
| Exon9-R | CTTCCACCCAGATTTCAATTC |                                |               |
| CDKN2A  | Exon10-F              | AGGCATTGGTTTTTAATGTATG         | amplification |
|         | Exon10-R              | CTGCTCAAAGAACTAATCAAC          |               |
|         | Exon11-F              | CCAAAAGTGTGCAGCTTGTTG          | amplification |
|         | Exon11-R              | CAGTTTCTGTCTGCTAGGAG           |               |
|         | Exon1-F               | GCTGTTCCCTGGTAGGGCCG           | amplification |
|         | Exon1-R               | GCCTGGGCTAGAGACGAATTAT         |               |
|         | Exon2-F               | TGACACCAAACACCCCGATT           | amplification |
|         | Exon2-R               | GGAAGCCTCCCCTTTTTCCG           |               |
|         | Exon3-F               | ATTAGACACCTGGGGCTTGTGT         | amplification |
|         | Exon3-R               | ATTATTTCCCATTTGCCGCCCTG        |               |

---

**Table S2. Antibody used in this study.**

| Antibody                                        | Application             | Source                  |
|-------------------------------------------------|-------------------------|-------------------------|
| Rabbit anti-human Phospho-I $\kappa$ B $\alpha$ | WB, 1:1000              | 2859, CST               |
| Rabbit anti-human I $\kappa$ B $\alpha$         | WB, 1:1000              | 4812, CST               |
| Rabbit anti-human Phospho-NF- $\kappa$ B p65    | WB, 1:1000<br>IP:1:50   | 3033, CST               |
| Rabbit anti-human NF- $\kappa$ B p65            | WB, 1:1000              | 8242, CST               |
| Rabbit anti-human GAPDH                         | WB, 1:1000              | 5174, CST               |
| Rabbit anti-human $\gamma$ H2AX                 | WB, 1:7500<br>IF, 1:250 | ab81299, abcam          |
| Rabbit anti-human Histone H3                    | WB, 1:2000              | 17168-1-AP, proteintech |
| Rabbit anti-human Lamin B1                      | WB, 1:1000              | 17416, CST              |
| Mouse anti-human Ku70                           | WB, 1:1000<br>IP:1:100  | sc-17789, santa cruz    |
| Mouse anti-human Ku80                           | WB, 1:700<br>IP:1:50    | sc-5280, santa cruz     |
| Rabbit anti-human DNA PKcs                      | WB, 1:2000              | ab32566, abcam          |
| Rabbit anti-human XRCC4                         | WB, 1:1000              | 15817-1-AP, proteintech |
| IL-6 monoclonal antibody                        | Neutralization          | 554543, BD Biosciences  |
| IL-8 monoclonal antibody                        | Neutralization          | 554726, BD Biosciences  |
| HGF monoclonal antibody                         | Neutralization          | AF-294-NA.R&D           |
| CCL2 (MCP-1) monoclonal antibody                | Neutralization          | 16-7096-81, Thermo      |
| Rabbit anti-human IL-8                          | IHC/IF, 1:250           | 27095-1-AP, proteintech |
| Rabbit anti-human/mouse IL-8                    | IF, 1:200               | A0286, ABclonal         |
| Rabbit anti-human/mouse $\alpha$ SMA            | IF, 1:2000              | 14395-1-AP, proteintech |
| Rabbit anti-mouse Ki67                          | IHC, 1:2000             | ab15580, abcam          |
| Rabbit anti-human/mouse PDGFR $\alpha$          | IF, 1:500               | ab203491, abcam         |
| Mouse anti-human PDPN                           | IF, 1:250               | 26981, CST              |
| Rabbit anti-human/mouse MHCII                   | IF, 1:200               | ab203491, abcam         |
| Goat anti-rabbit Alexa Fluor 488                | IF, 1:250               | ab150077, abcam         |
| Goat anti-mouse Alexa Fluor 555                 | IF, 1:250               | ab150114, abcam         |
| PE/Cv7 mouse anti-human CD45                    | Flow Cytometry          | 25-0459-42, Invitrogen  |
| FITC mouse anti-human CD31                      | Flow Cytometry          | 555445, BD Biosciences  |
| PE mouse anti-human CD326 (EpCAM)               | Flow Cytometry          | 566841, BD Biosciences  |
